# Supplementary material for: Bifunctional upconverting luminescent-magnetic FeS2@NaYF4:Yb3+,Er3+ core@shell nanocomposites with tunable luminescence for temperature sensing
Source: Royal Society of Chemistry journal article supplement (doi:10.1039/d4tc01117a), 2024-01-01
Supplement: d4tc01117a1.pdf [file d4tc01117a1.pdf]

## Bifunctional upconverting luminescent-magnetic FeS<sub>2</sub>@NaYF<sub>4</sub>:Yb<sup>3+</sup>, Er<sup>3+</sup> core@shell nanocomposites with tunable luminescence for temperature sensing

Przemysław Woźny<sup>1,\*</sup>, Kevin Soler Cerracedo<sup>1</sup>, Marcin Perzanowski<sup>2</sup>, Jan Moszczyński<sup>1</sup>, Stefan Lis<sup>1</sup>, Marcin Runowski<sup>1,\*</sup>

<sup>1</sup>Adam Mickiewicz University, Faculty of Chemistry, Uniwersytetu Poznańskiego 8, 61-614 Poznań, Poland

<sup>2</sup>Institute of Nuclear Physics Polish Academy of Sciences, Radzikowskiego 152, 31-342, Kraków, Poland

Corresponding author: [przemyslaw.wozny@amu.edu.pl](mailto:przemyslaw.wozny@amu.edu.pl) ; [runowski@amu.edu.pl](mailto:runowski@amu.edu.pl)

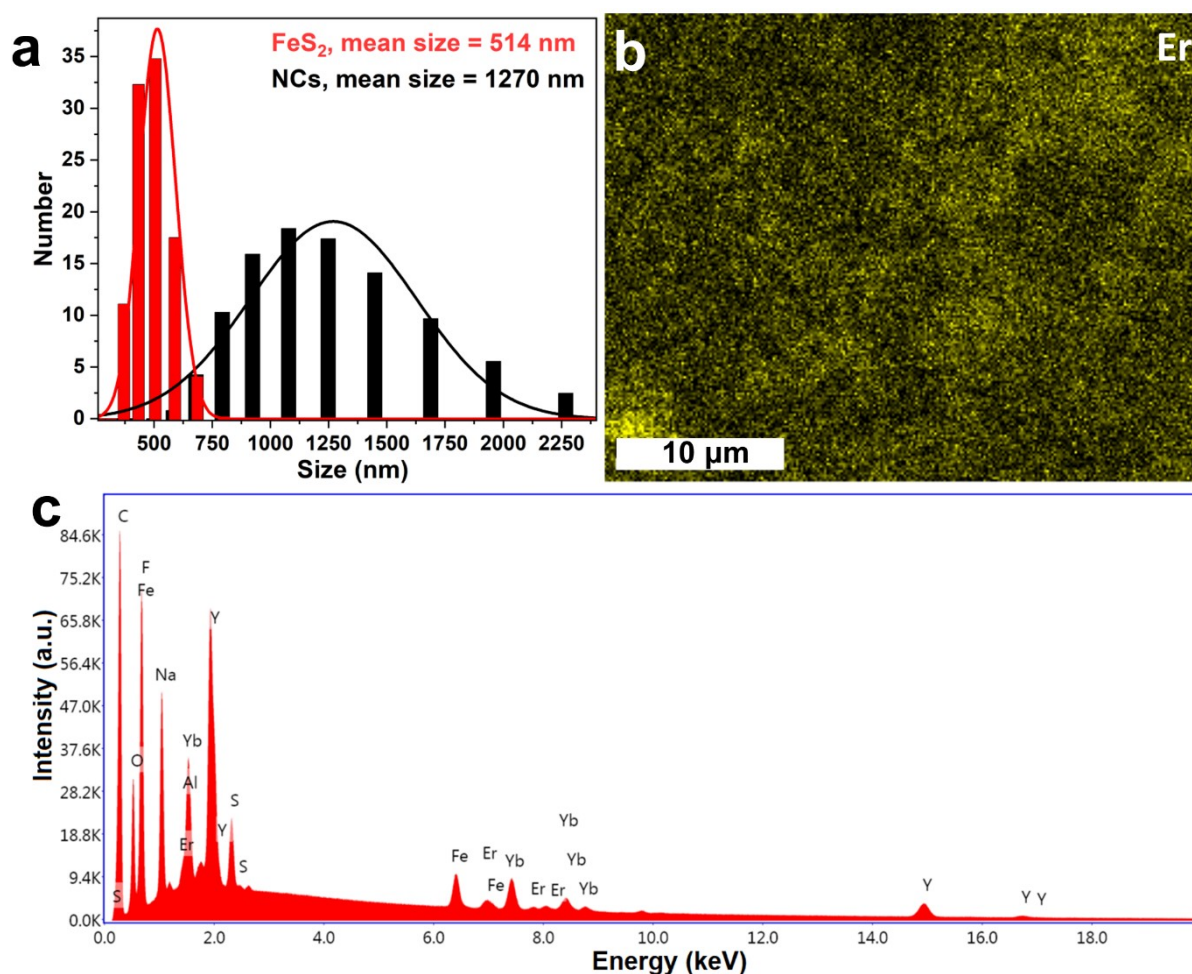

Fig. S1 The DLS hydrodynamic size of FeS<sub>2</sub> core nanoparticles and FeS<sub>2</sub>@NaYF<sub>4</sub>:Yb<sup>3+</sup>, Er<sup>3+</sup> nanocomposite (a), elemental mapping of the Er<sup>3+</sup> ions (b), and the EDX spectrum of the FeS<sub>2</sub>@NaYF<sub>4</sub>:Yb<sup>3+</sup>, Er<sup>3+</sup> nanocomposite (c).

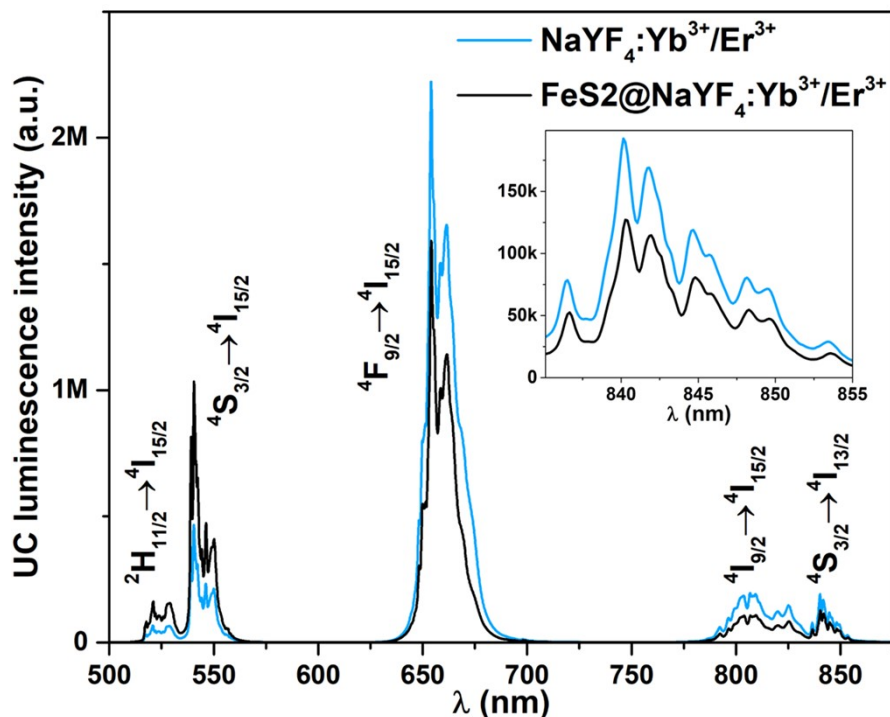

Fig. S2 Non-normalized emission spectra of NaYF<sub>4</sub>:Yb<sup>3+</sup>,Er<sup>3+</sup> NPs and FeS<sub>2</sub>@NaYF<sub>4</sub>:Yb<sup>3+</sup>,Er<sup>3+</sup> NC, recorded at the same setting parameters.

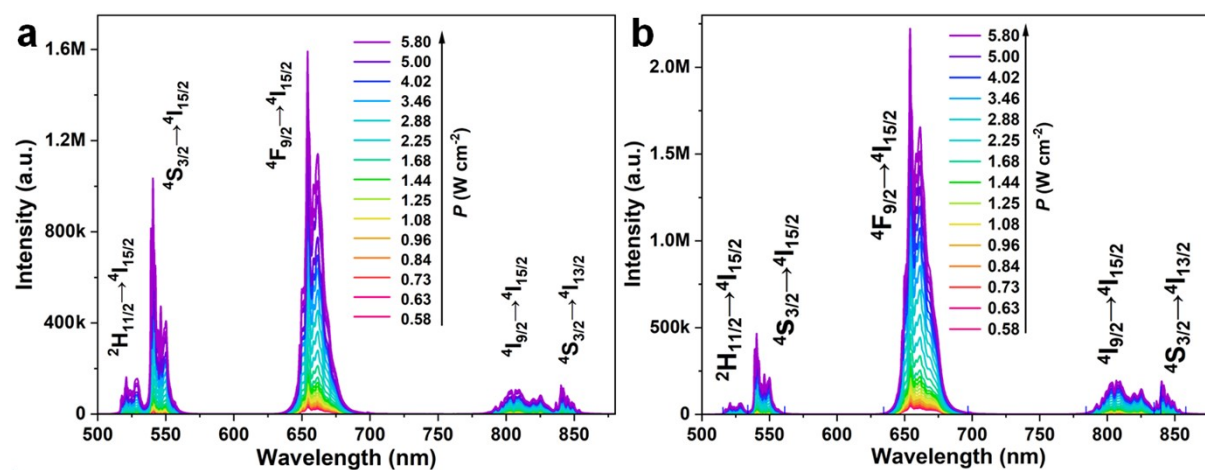

Fig. S3 UC Emission spectra of the NaYF<sub>4</sub>:Yb<sup>3+</sup>,Er<sup>3+</sup> NPs (a) and FeS<sub>2</sub>@NaYF<sub>4</sub>:Yb<sup>3+</sup>,Er<sup>3+</sup> NC (b), recorded with the use of different pump power densities.
